# Supplementary material
Source: PubMed Central journal article supplement (PMC1435952)
Supplement: cmaj_174_9_1273__1.pdf [file cmaj_174_9_1273__1.pdf]

## Association of low intake of milk and vitamin D during pregnancy with decreased birth weight

Cynthia A. Mannion, Katherine Gray-Donald, Kristine G. Koski

The unabridged version of this article is available at [www.cmaj.ca/cgi/content/full/174/9/1273](http://www.cmaj.ca/cgi/content/full/174/9/1273)

∞ See related article page 1287

### ABSTRACT

**Background:** Some pregnant women may be advised or choose to restrict milk consumption and may not take appropriate supplements. We hypothesized that maternal milk restriction during pregnancy, which can reduce intakes of protein, calcium, riboflavin and vitamin D, might represent a health risk by lowering infant birth weight.

**Methods:** We screened women between the ages of 19 and 45 years who were attending prenatal programs in Calgary, Alberta (51°N) for low milk consumption ( $\leq 250$  mL/d). Using repeat dietary recalls, we compared these women and their offspring with women whose daily milk consumption exceeded 250 mL (1 cup). Birth weight, length and head circumference were obtained from birth records.

**Results:** Women who consumed  $\leq 250$  mL/d of milk ( $n = 72$ ) gave birth to infants who weighed less than those born to women who consumed more ( $n = 207$ ; 3410 g v. 3530 g, respectively;  $p = 0.07$ ). Infant lengths and head circumferences were similar. Women who restricted milk intake had statistically significantly lower intakes of protein and vitamin D as well. In multivariate analyses controlled for previously established predictors of infant birth weight, milk consumption and vitamin D intake were both significant predictors of birth weight. Each additional cup of milk daily was associated with a 41 g increase in birth weight (95% confidence interval [CI] 14.0–75.1 g); each additional microgram of vitamin D, with an 11 g increase (95% CI 1.2–20.7 g). Neither protein, riboflavin nor calcium intake was found to predict birth weight.

**Interpretation:** Milk and vitamin D intakes during pregnancy are each associated with infant birth weight, independently of other risk factors.

CMAJ 2006;174(9):1273-7

calcium, protein or riboflavin. Milk restriction is a risk factor for pregnancy-associated hypertension.<sup>6</sup> Low vitamin D intake is associated with neonatal rickets<sup>7</sup> and decreased birth weight.<sup>8</sup> Inadequate consumption of riboflavin is associated with decreases in weight,<sup>9</sup> length and head circumference of babies at birth.<sup>10</sup>

Vitamin D is found in few commonly consumed foods except for milk fortified with the vitamin.<sup>11</sup> Dermal conversion of the precursor cholecalciferol to activated vitamin D is a seasonally unreliable source, particularly when the exposure of skin to sunlight is limited,<sup>12</sup> and may not compensate for low nutritional intake. Under optimal conditions, 15 minutes of daily exposure of the hands and face to sun is required to produce adequate vitamin D,<sup>13</sup> but this conversion is reduced by the prolonged winter season at more polar latitudes,<sup>14,15</sup> by use of sunscreens with a sun protection factor (SPF) above 8,<sup>16</sup> and by ozone air pollution.<sup>13</sup> People whose skin pigmentation is dark are more vulnerable than others to insufficient vitamin D conversion.<sup>16</sup>

In this study we compared the birth weight, crown–heel length and head circumference of newborns whose mothers restricted their intake of milk during pregnancy with the babies of those who did not.

### Methods

Between May 1997 and June 1999 we screened 2091 women who attended prenatal classes at 3 hospitals in Calgary, Alberta. The study was approved by the Institutional Review Board of McGill University as well as by the Calgary Health Region Ethics Board.

Women were asked for demographic data, lifestyle characteristics (e.g., smoking habits, highest level of education achieved) and if they had certain metabolic conditions (e.g., diabetes, hypertension) or a multiple pregnancy. Only healthy mothers with singleton pregnancies were included; subjects with metabolic, cardiovascular or renal disorders (identified from self-reports or later medical-chart review) were excluded.

For purposes of analysis we defined restriction as the daily consumption of 1 cup (250 mL) of milk or less. This

Many women choose or are advised to avoid drinking milk for a variety of reasons, including the prevention of allergies in their children.<sup>1</sup> Limiting milk intake compromises the quality of the maternal diet;<sup>2–5</sup> women who avoid milk may not obtain adequate levels of vitamin D,

amount was chosen because the Canada Food Guide for Healthy Eating recommends servings in cup measures; cup portions are easily recognizable; and it is known that 1 cup of milk supplies approximately 300 mg of calcium, 90 IU of vitamin D, 5 g of fat (in 2% milk), 8.6 g protein, 0.43 g riboflavin and 536 mJ (128 kcal) energy.<sup>17</sup> We anticipated that women who consumed less than a cup of milk per day would be unlikely to achieve the recommended adequate intakes of vitamin D (200 IU = 5 µg) and calcium (1000 mg/d) from other food sources without vitamin and mineral supplementation. We supplied interviewers and participants with a styrofoam cup (195 mL), a plate (25 cm diameter), a bowl (340 mL) and a flexible 30-cm ruler to assist with estimating quantities. Dietary data were collected by repeat 24-hour dietary telephone recalls, an approach that has been previously validated.<sup>18,19</sup>

Food and nutrient data were analyzed with the 1997 CANDAT Nutrient Calculation System (Godin London Inc., London, Ont.) with use of the *Canadian Nutrient File*,<sup>20</sup> plus information for 267 food items that was obtained from either food manufacturers' available data or the USDA Nutrient Database.<sup>21</sup> We calculated maternal weight gain by subtracting pregravid weight from the last recorded maternal weight before delivery. Infant birth weight, crown–heel length and head circumference were taken from medical records.

Data for milk and nutrient intake (diet plus vitamin and mineral supplements) were first transformed to approximate normal distributions; the total variation was then adjusted with the 1986 National Research Council method.<sup>22</sup> We removed day-to-day variability so we could estimate prevalence of nutritional inadequacies compared with dietary reference

intakes.<sup>23,24</sup> The prevalence of inadequacy for a given nutrient was estimated by the percentage of mothers with intakes below the EAR, defined as the median of the requirement distribution for a population.<sup>23</sup> Differences in numbers of restrictors ( $\leq 1$  cup milk) and nonrestrictors ( $> 1$  cup) who consumed less than the EARs for protein (0.88 g/kg/d) and riboflavin (1.2 mg/d) were calculated and tested ( $\chi^2$ ). Dietary adequacy was estimated as the percentage of the group with adjusted nutrient intakes below the EAR. We reported mean daily adequate intakes for calcium and vitamin D only because the scientific evidence to date for these nutrients is insufficient to derive EARs.<sup>23</sup>

We conducted a multivariable analysis to control for baseline indicators and nutrient intake. We chose birth weight, head circumference and crown–heel length as the dependent variables for either regression model. A *p* value of 0.05 or less was considered statistically significant.

## Results

During the 2 years of data collection spanning all 4 seasons, 307 of 2091 women attending prenatal classes (14.7%) indicated that they restricted their milk intake throughout pregnancy. The reasons cited for milk restriction were mainly lactose intolerance (usually self-diagnosed) and gastrointestinal discomfort.

Our study groups were similar for maternal age, weight before pregnancy, body mass index, gestational weight gain, smoking habits and education (Table 1). Our sample population was healthy and well-educated; the majority cited Canada as their country of origin, smoked little and fell (75%) within the recommended pregravid weight range.

**Table 1:** Characteristics of women who did and did not restrict their milk consumption during pregnancy and measurements of their newborns

| Characteristic                              | Mean (standard deviation)*        |                               | <i>p</i> value |
|---------------------------------------------|-----------------------------------|-------------------------------|----------------|
|                                             | No restriction<br><i>n</i> = 207* | Restriction<br><i>n</i> = 72* |                |
| <b>Maternal</b>                             |                                   |                               |                |
| Age at delivery, yr                         | 31.2 (4.3)                        | 30.0 (4.54)                   | 0.11           |
| Height, m†                                  | 1.66 (0.62)                       | 1.65 (0.52)                   | 0.053          |
| Weight before pregnancy, kg†                | 63.9 (10.0)                       | 62.0 (13.36)                  | 0.25           |
| Body mass index, kg/m <sup>2</sup>          | 23.2 (3.8)                        | 22.9 (4.61)                   | 0.61           |
| Gestational weight gain, kg                 | 16.8 (5.4)                        | 15.9 (6.65)                   | 0.32           |
| Smoking, no. (%)†                           | 12 (5.8)                          | 4 (5.56)                      | 0.97           |
| University education, no. (%)†              | 94 (46.5)‡                        | 37 (53.62)‡                   | 0.33           |
| Vitamin or mineral supplement use, no. (%)† | 201 (97.1)                        | 38 (54.28)‡                   | 0.050          |
| <b>Infant</b>                               |                                   |                               |                |
| Birth weight, g                             | 3530 (466)                        | 3410 (475)‡                   | 0.07           |
| Length, cm                                  | 51.4 (3.6)‡                       | 51.1 (3.5)‡                   | 0.46           |
| Head circumference, cm                      | 34.6 (1.5)‡                       | 34.3 (1.5)‡                   | 0.19           |

\*Unless indicated otherwise.

†Self-reported.

‡2.8%–4.2% of study participants did not respond to the question (2–8 data were missing).

Our pregnant women reported use of prenatal vitamins or mineral supplements, with lower use among milk restrictors (Table 1). Energy and fat intakes were similar between the 2 groups, but significantly more milk restrictors had protein intakes below the calculated EAR for pregnant women than nonrestrictors. Riboflavin was unaffected by milk restriction — it is found in many other foods, and all women had adequate intakes (Table 2).<sup>23,24</sup>

When milk or vitamin D intakes were added into our multiple regression models, each emerged as a significant independent predictor of birth weight (Table 3), although neither predicted infant length or head circumference. When we controlled for previously established predictors of infant birth weight<sup>25</sup> and used the  $\beta$  coefficient to measure the magnitude of the effect of milk intake on birth weight, we found that for each cup of milk consumed per day, birth weight increased 41 g (95% confidence interval [CI] 13–75 g) on average (Table 3). Thus, mothers who consume the 3 cups of milk per day that is recommended in Canada's Food Guide for Healthy Eating throughout pregnancy, at birth their infants would weigh 123 g more, on average. We also observed a positive relation between vitamin D intake and birth weight: for each 1- $\mu$ g increase of dietary vitamin D (food plus supplements), birth weight was increased by 11 g (95% CI 1.2–20.7 g; Table 3).

Similar regression models with protein entered as the sole nutrient indicated no independent contribution of protein to birth weight, infant length or head circumference in our otherwise healthy mothers. Neither did calcium or riboflavin predict birth weight (Table 3), infant length or head circumference (data not shown).

## Interpretation

Our study showed that restricting fortified milk or vitamin D intake during pregnancy lowered infant birth weight in otherwise healthy, nonsmoking, well-educated mothers. This is an important finding because increasing numbers of women are restricting milk consumption during pregnancy, believing that it will lower fat intake,<sup>26–28</sup> minimize weight gain,<sup>29</sup> treat self-diagnosed lactose intolerance<sup>27</sup> or prevent their children from developing allergies.<sup>1</sup> Mothers and health professionals need to understand that this dietary practice may restrict essential nutrients and may negatively affect fetal development.

Our study is limited because only 24% of women who reported restricting milk consumption agreed to participate. We were not able to obtain maternal or infant blood samples for measurements of vitamin D; however, deficiency of this vitamin is well documented among Canadian women,<sup>30,31</sup> including a recent study that found Canadian mothers and their infants to have high rates of vitamin D deficiency.<sup>32</sup> Our vitamin D results are restricted to women living at latitudes associated with low sunlight exposure; milk-restricting pregnant women living in other areas may have better vitamin D status.

Vitamin D may be an important regulator of fetal growth. The vitamin reportedly increases fetal weight in women with

**Table 2:** Nutrient intakes of women who did and did not restrict their milk consumption during pregnancy

| Nutrients             | Mean (standard deviation) |                       | p value |
|-----------------------|---------------------------|-----------------------|---------|
|                       | No restriction<br>n = 207 | Restriction<br>n = 72 |         |
| Energy, kcal          | 2465 (501)                | 2424 (664)            | 0.06    |
| Fat, g/d              | 83 (25)                   | 87 (33)               | 0.33    |
| Protein, g/d          | 106 (27)                  | 95 (35)               | 0.014   |
| Protein, % < EAR*     | 9.2†                      | 20.8†                 | 0.009   |
| Riboflavin, mg/d      | 6.5 (4.8)                 | 6.6 (6.1)             | 0.80    |
| Riboflavin, % < EAR*  | 0                         | 0                     |         |
| Calcium, mg/d         | 1864‡ (497)               | 1726‡ (765)           | 0.16    |
| Vitamin D, $\mu$ g/d‡ | 13.1‡ (4.5)               | 7.9‡ (4.7)            | < 0.001 |

Note: EAR = estimated average (dietary) requirement.

\*EARs for pregnancy (protein 0.88 g/kg/d, riboflavin 1.2 mg/d) were taken from *Dietary Reference Intakes: Applications in Dietary Assessment*. Washington: Institute of Medicine National Academy Press; 2000.<sup>23,24</sup>

†p < 0.001 compared with EAR.

‡Nutritionally adequate, according to *Dietary Reference Intakes* (see above).

hypocalcemia<sup>33</sup> and improves maternal and fetal plasma concentrations of 25-hydroxycholecalciferol.<sup>34</sup> Low concentrations of vitamin D (< 40 nmol/L) have been associated with low concentrations of insulin-like growth factor (IGF-1) in maternal and umbilical cord serum from women with pre-eclampsia and infants who are small for their gestational age.<sup>35</sup> Women who practice milk restriction reportedly experience diminished serum concentrations of vitamin D and calcium, and decreased third-trimester weight gain.<sup>36</sup> One author<sup>37</sup> has reported an inverse association between calcium absorption and birth weight that was partially explained by vitamin D intake. Thus, our study demonstrates that in pregnant women living where sun conditions for year-round vitamin D synthesis are less than ideal,<sup>12,30,31</sup> poor vitamin D intake from food sources (including fortified milk) and failure to select appropriate vitamin and mineral supplementation can result in lower infant birth weight.

In the past few years, it has been suggested that currently recommended vitamin D intakes may be too low to prevent insufficiency in the general population.<sup>15,38,39</sup> Some authors<sup>39,40</sup> have urged higher intake recommendations for vitamin D in North America for those living at or above latitudes ranging from 42° to 52° N, similar to practices in European countries.<sup>41</sup> Our study results suggest that increased recommendations for vitamin D intake should extend to pregnant women. Current recommendations to restrict intake of fortified milk are clearly ill-advised for those living at latitudes where dermal conversion of 7-dehydrocholecalciferol to active vitamin D is seasonally limited. Fortified milk provides an important source of vitamin D and calcium, and contributes to adequate protein intake. Practitioners should query pregnant women about their consumption of fortified milk and multivitamins, specifically those containing vitamin D, to avoid the risk of lowered birth weight as a result of insufficient intake, particularly when and where sun exposure is limited.

**Table 3:** Two regression models for predicting infant birth weight ( $n = 269$ )

| Characteristic                                   | Milk intake model*           |           | Nutrient model†              |           |
|--------------------------------------------------|------------------------------|-----------|------------------------------|-----------|
|                                                  | $\beta$ coefficient (95% CI) | $p$ value | $\beta$ coefficient (95% CI) | $p$ value |
| <b>Gestational</b>                               |                              |           |                              |           |
| Weight gain, kg                                  | 13.13 (4.04 to 22.17)        | 0.005     | 13.73 (4.73 to 22.73)        | < 0.001   |
| Age, wk                                          | 24.73 (1.88 to 47.60)        | 0.035     | 25.19 (2.28 to 48.10)        | 0.032     |
| <b>Maternal</b>                                  |                              |           |                              |           |
| Age, yr                                          | -13.74 (-24.40 to -3.30)     | 0.012     | -14.69 (-25.39 to -3.99)     | 0.008     |
| Height, cm                                       | 83.08 (32.84 to 133.32)      | 0.001     | 87.38 (37.13 to 137.62)      | < 0.001   |
| Education, yr‡                                   | 112.99 (7.89 to 218.09)      | 0.036     | 111.92 (6.63 to 217.21)      | 0.038     |
| Body mass index, kg/m <sup>2</sup>               | 24.89 (11.62 to 38.16)       | < 0.001   | 26.68 (13.37 to 39.99)       | < 0.001   |
| Milk intake, L                                   | 9.75 (3.30 to 17.77)         | 0.016     | NA                           |           |
| Cups*                                            | 41.21 (13.96 to 75.12)       |           | NA                           |           |
| Vitamin D intake, $\mu\text{g}/\text{d}\ddagger$ | NA                           |           | 10.97 (1.19 to 20.75)        | 0.029     |

Note: CI = confidence interval, NA = not applicable.

\*Intercept = -141.57, overall  $R^2 = 0.1806$ ,  $F = 7.93$ ,  $p < 0.0001$  for the model. After controlling for gestational weight gain and maternal age, height, education and body mass index, every 250-mL (1-cup) increase in daily milk intake was associated with an increase in infant birth weight of 41.2 g.

†Intercept = -332.65, overall  $R^2 = 0.1773$ ,  $F = 7.76$ ,  $p < 0.0001$  for the model. After controlling for the above factors, every 1- $\mu\text{g}$  increase in daily vitamin D intake was associated with an increase in infant birth weight of 11.0 g.

‡Categorized as those with university education and those without.

This article has been peer reviewed.

From the Faculty of Nursing (Mannion), University of Calgary, Calgary, Alta., and the School of Dietetics and Human Nutrition (Koski, Gray-MacDonald, Koski) and the Faculty of Medicine (Koski), McGill University, Ste. Anne de Bellevue, Que.

**Competing interests:** None declared.

**Contributors:** Kristine Koski conceived the idea that milk restriction might be related to poor fetal growth. She and Katherine Gray-Donald received funding to conduct the study, which was implemented and managed by Cynthia Mannion. All authors were involved in data analysis, drafting the paper and revising it. All authors edited the final submission and approved this article in its final form.

## REFERENCES

- Chandra RK. Food allergy and nutrition in early life: implications for later health. *Proc Nutr Soc* 2000;59:273-7.
- Godfrey KM, Barker DJ, Robinson S, et al. Maternal birthweight and diet in pregnancy in relation to the infant's thinness at birth. *Br J Obstet Gynaecol* 1997;104:663-7.
- Giddens JB, Krug SK, Tsang RC, et al. Pregnant adolescent and adult women have similarly low intakes of selected nutrients. *J Am Diet Assoc* 2000;100:1334-40.
- Ortega RM, Quintas ME, Martinez RM, et al. Riboflavin levels in maternal milk: the influence of vitamin B2 status during the third trimester of pregnancy. *J Am Coll Nutr* 1999;18:324-9.
- Di Cintio E, Parazzini F, Chatenoud L, et al. Dietary factors and risk of spontaneous abortion. *Eur J Obstet Gynecol Reprod Biol* 2001;95:132-6.
- Duvekot EJ, de Groot CJ, Bloemenkamp KW, et al. Pregnant women with a low milk intake have an increased risk of developing preeclampsia. *Eur J Obstet Gynecol Reprod Biol* 2002;105:11-4.
- Bullock B, Schubert CJ, Brophy PD, et al. Cause and clinical characteristics of rib fractures in infants. *Pediatrics* 2000;105:E48.
- Marya RK, Rathee S, Lata V, et al. Effects of vitamin D supplementation in pregnancy. *Gynecol Obstet Invest* 1981;12:155-61.
- Sanchez DJ, Murphy MM, Bosch-Sabater J, et al. Enzymic evaluation of thiamin, riboflavin and pyridoxine status of parturient mothers and their newborn infants in a Mediterranean area of Spain. *Eur J Clin Nutr* 1999;53:27-38.
- Badart-Smook A, van Houwelingen AC, Al MD, et al. Fetal growth is associated positively with maternal intake of riboflavin and negatively with maternal intake of linoleic acid. *J Am Diet Assoc* 1997;97:867-70.
- Starkey LJ, Johnson-Down L, Gray-Donald K. Food habits of Canadians: comparison of intakes in adults and adolescents to Canada's Food Guide to Healthy Eating. *Can J Diet Pract Res* 2001;62:61-9.
- Webb AR, Kline L, Holick MF. Influence of season and latitude on the cutaneous synthesis of vitamin D<sub>3</sub>: exposure to winter sunlight in Boston and Edmonton will not promote vitamin D<sub>3</sub> synthesis in human skin. *J Clin Endocrinol Metab* 1988;67:373-8.
- Holick MF. Environmental factors that influence the cutaneous production of vitamin D. *Am J Clin Nutr* 1995;61:638S-45S.
- Ovesen L, Andersen R, Jakobsen J. Geographical differences in vitamin D status, with particular reference to European countries. *Proc Nutr Soc* 2003;62:13-21.
- Glerup H, Mikkelsen K, Poulsen L, et al. Commonly recommended daily intake of vitamin D is not sufficient if sunlight exposure is limited. *J Intern Med* 2000;247:260-8.
- Grover SR, Morley R. Vitamin D deficiency in veiled or dark-skinned pregnant women. *Med J Aust* 2001;175:251-2.
- Milk, Nutrition Communications: Making Healthy Eating Easy. Milk facts: nutrients in milk. Available: [www.media@milknutrition.org/media/index.html](http://www.media@milknutrition.org/media/index.html) (accessed 2006 Feb 20).
- Casey PH, Goolsby SL, Lensing SY, et al. The use of telephone interview methodology to obtain 24-hour dietary recalls. *J Am Diet Assoc* 1999;99:1406-11.
- Galasso R, Panico S, Celentano E, et al. Relative validity of multiple telephone versus face-to-face 24-hour dietary recalls. *Ann Epidemiol* 1994;4:332-6.
- Health Canada. *Canadian Nutrient File*. Ottawa: Health Canada; 1997. Available: [www.hc-sc.gc.ca/fn-an/nutrition/fiche-nutri-data/index\\_e.html](http://www.hc-sc.gc.ca/fn-an/nutrition/fiche-nutri-data/index_e.html) (accessed 2006 Mar 19).
- Adams CF. *Nutritive value of American foods in common units*. *Agricultural Handbook No. 456*. Washington: Agricultural Research Services, US Department of Agriculture; 1975.
- National Research Council. *Nutrient adequacy: assessment using food consumption surveys*. Washington: National Academy Press; 1986.
- Institute of Medicine. *Dietary reference intakes: applications in dietary assessment*. Washington: National Academy Press; 2000.
- National Academy of Sciences. *Dietary reference intakes for energy, carbohydrate, fiber, fat, fatty acids, cholesterol, protein and amino acids (macronutrients)* (2005). Available: [www.nap.edu/openbook/0309085373/html](http://www.nap.edu/openbook/0309085373/html) (accessed 2006 Feb 20).
- Kramer MS. Determinants of low birth weight: methodological assessment and meta-analysis. *Bull World Health Organ* 1987;65:663-737.
- Hagy LF, Brochetti D, Duncan SE. Focus groups identified women's perceptions of dairy foods. *J Women Aging* 2000;12:99-115.
- Cashel K, Crawford D, Deakin V. Milk choices made by women: what influences them, and does it impact on calcium intake? *Public Health Nutr* 2000;3:403-10.
- Chapman KM, Chan MW, Clark CD. Factors influencing dairy calcium intake in women. *J Am Coll Nutr* 1995;14:336-40.
- Gulliver P, Horwath CC. Assessing women's perceived benefits, barriers, and stage of change for meeting milk product consumption recommendations. *J Am Diet Assoc* 2001;101:1354-7.
- Vieth R, Cole DE, Hawker GA, et al. Wintertime vitamin D insufficiency is common in young Canadian women, and their vitamin D intake does not prevent it. *Eur J Clin Nutr* 2001;55:1091-7.
- Rucker D, Allan JA, Fick GH, et al. Vitamin D insufficiency in a population of healthy western Canadians. *CMAJ* 2002;166:1517-24.
- Weiler H, Fitzpatrick-Wong S, Veitch R, et al. Vitamin D deficiency and whole-body and

- femur bone mass relative to weight in healthy newborns. *CMAJ* 2005;172(6):757-61.
33. Marya RK, Rathee S, Dua V, et al. Effect of vitamin D supplementation during pregnancy on foetal growth. *Indian J Med Res* 1988;88:488-92.
  34. Cockburn F, Belton NR, Purvis RJ, et al. Maternal vitamin D intake and mineral metabolism in mothers and their newborn infants. *BMJ* 1980;281:11-4.
  35. Halhali A, Tovar AR, Torres N, et al. Preeclampsia is associated with low circulating levels of insulin-like growth factor I and 1,25-dihydroxyvitamin D in maternal and umbilical cord compartments. *J Clin Endocrinol Metab* 2000;85:1828-33.
  36. Specker BL. Do North American women need supplemental vitamin D during pregnancy or lactation? *Am J Clin Nutr* 1994;59:484S-90S.
  37. Arden NK, Major P, Poole JR, et al. Size at birth, adult intestinal calcium absorption and 1,25(OH)<sub>2</sub> vitamin D. *QJM* 2002;95:15-21.
  38. Hollis BW, Wagner CL. Assessment of dietary vitamin D requirements during pregnancy and lactation. *Am J Clin Nutr* 2004;79:717-26.
  39. Vieth R, Fraser D. Vitamin D insufficiency: no recommended dietary allowance exists for this nutrient. *CMAJ* 2002;166(12):1541-2.
  40. Ritchie LD, King JC. Dietary calcium and pregnancy-induced hypertension: Is there a relation? *Am J Clin Nutr* 2000;71:1371S-4S.
  41. Erkkola M, Karppinen M, Jarvinen A, et al. Folate, vitamin D, and iron intakes are low among pregnant Finnish women. *Eur J Clin Nutr* 1998;52:742-8.

---

**Correspondence to:** Dr. Kristine Koski, Director, School of Dietetics and Human Nutrition, McGill University, 21111 rue Lakeshore, Ste. Anne de Bellevue, QC H9X 3V9; [kristine.koski@mcgill.ca](mailto:kristine.koski@mcgill.ca)

## Editor's take

- Women increasingly restrict milk intake during pregnancy for a variety of reasons. Does this have an effect on their infants' birth weight?
- In this study, women whose daily consumption of milk during pregnancy was 1 cup (250 mL) or less consumed less protein and vitamin D and gave birth to smaller babies than did mothers who drank more milk. Every 1-cup increase in daily milk consumption increased birth weight by 41 g; each 1- $\mu$ g increase in daily vitamin D intake increased it by 11 g.

**Implications for practice:** Clinicians should be alert to the effects of milk restriction and its associated reduction in vitamin D intake, and encourage pregnant women to maintain milk consumption. Adequate intake of vitamin D is especially important during winter months.
